# Supplementary material for: Hydrocinnamic Acid and Perillyl Alcohol Potentiate the Action of Antibiotics against Escherichia coli
Source: MDPI journal article supplement (doi:10.3390/antibiotics12020360), 2023-02-09
Supplement: s1 [file s1]

## Supplementary Materials

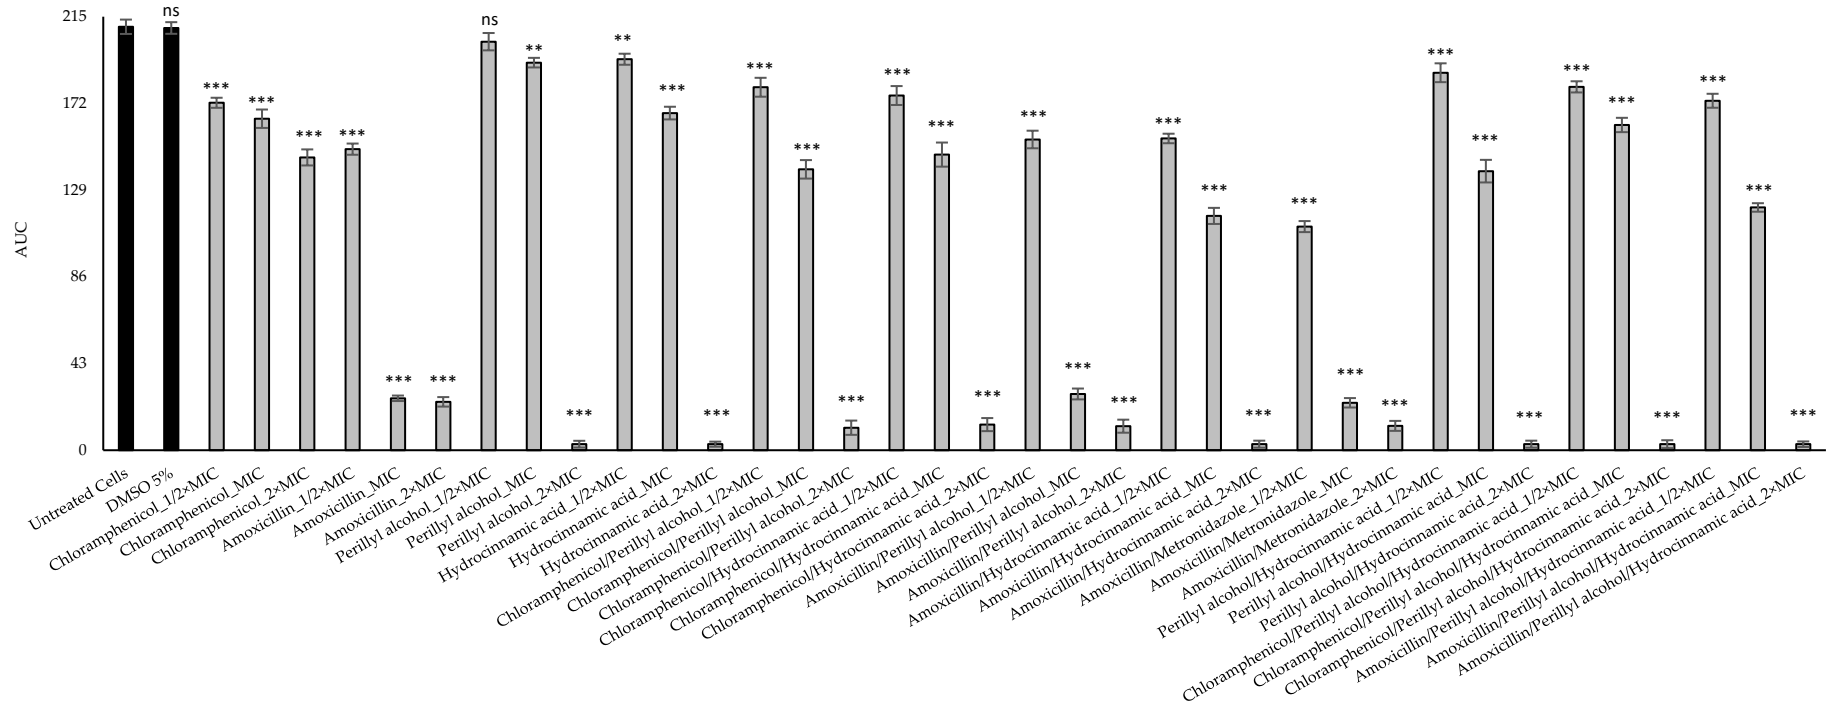

**Figure S1.** AUCs values for the time-kill curves. The number of stars indicates the level of statistical significance of the difference between untreated cells and *E. coli* exposed to each treatment: (\*\*) for a p-value less than 0.05 and (\*\*\*) for a p-value less than 0.01. When the statistical difference was not significant, ns was displayed. Values are the mean  $\pm$  standard deviation for at least two independent experiments.
